# Supplementary material
Source: PubMed Central journal article supplement (PMC4113011)
Supplement: NIHMS410943-supplement-Supplemental_Figure_1.pdf [file NIHMS410943-supplement-Supplemental_Figure_1.pdf]

# SUPPLEMENTAL MATERIAL

A

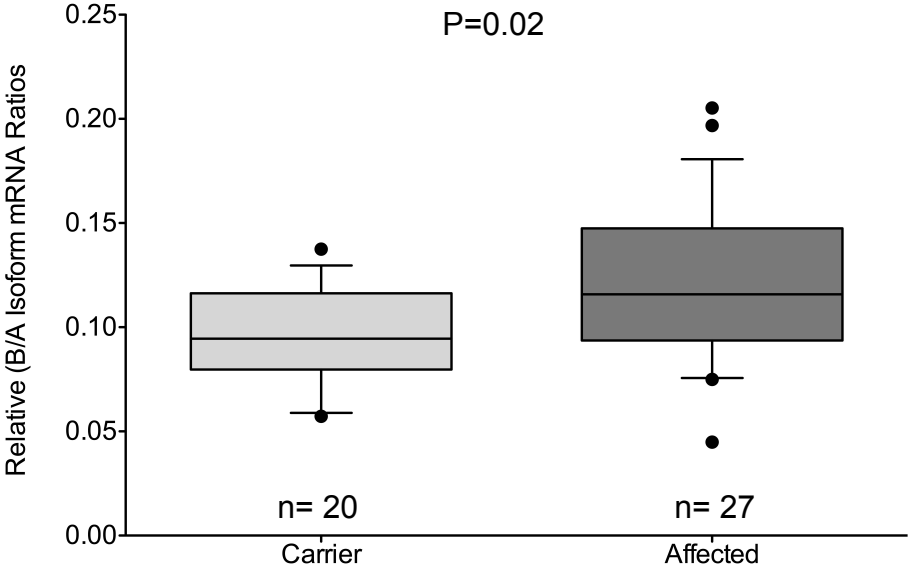

B

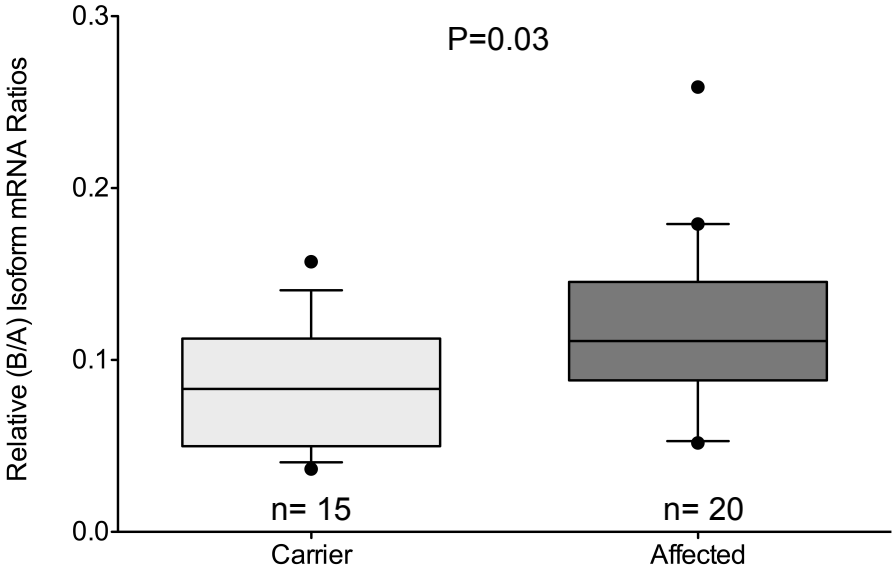

Supplementary Figure 1

**Figure Legend for supplementary figure 1.**

**Supplementary Figure 1.** *BMP2* isoform ratios as determined by real-time PCR in CLs from carriers/unaffected (light gray) and affected/patients (dark gray) containing NMD+ (**A**) and NMD- (**B**) mutations. Data are shown as box and whiskers plots with whiskers indicating Tukey whiskers and extreme data points indicated by filled circles. An  $\alpha$ -level of 0.05 was chosen, and P-values < 0.05 were considered statistically significant.
